# Supplementary material for: Senescent Cells in Growing Tumors: Population Dynamics and Cancer Stem Cells
Source: PubMed Central journal article supplement (PMC3261911; doi:10.1371/journal.pcbi.1002316), 2012-01-19
Supplement: pcbi.1002316.s007.pdf [file pcbi.1002316.s007.pdf]

| Experiment                     | cells plated | n. of colonies  | area covered [%] |
|--------------------------------|--------------|-----------------|------------------|
| ABCG2- GFP (98 days)           | 200          | $3987 \pm 1521$ | $2.25 \pm 0.96$  |
| ABCG2- GFP-survivin (98 days)  | 200          | $7320 \pm 1560$ | $25.4 \pm 7.5$   |
| unsorted GFP (start)           | 200          | $1514 \pm 141$  | $2.6 \pm 0.2$    |
| unsorted GFP-survivin (start)  | 200          | $1161 \pm 78$   | $1.8 \pm 0.1$    |
| ABCG2- GFP (88 days)           | 500          | $640 \pm 86$    | $1.8 \pm 0.3$    |
| ABCG2- GFP-survivin (88 days)  | 500          | $750 \pm 50$    | $2.6 \pm 0.2$    |
| ABCG2- untransfected (88 days) | 500          | $1201 \pm 202$  | $1.7 \pm 0.2$    |
