# Supplementary material for: Senescent Cells in Growing Tumors: Population Dynamics and Cancer Stem Cells
Source: PLOS journal article supplement (doi:10.1371/journal.pcbi.1002316), 2012-01-19
Supplement: S6 (10.1371/journal.pcbi.1002316.s006) [file journal.pcbi.1002316.s006]

| IGR39 ABCG2+ |                | IGR39 ABCG2- |                | IGR37 ABCG2+ |                 | IGR37 ABCG2- |                 |
|--------------|----------------|--------------|----------------|--------------|-----------------|--------------|-----------------|
| day          | % $\beta$ -gal | day          | % $\beta$ -gal | day          | % $\beta$ -gal  | day          | % $\beta$ -gal  |
| 25           | $1.7 \pm 0.5$  | 24           | $2.5 \pm 0.7$  | 1            | $1.0 \pm 0.2$   | 1            | $1.0 \pm 0.5$   |
| 79           | $8 \pm 1$      | 43           | $2.4 \pm 0.5$  | 25           | $0.4 \pm 0.1$   | 56           | $3.6 \pm 0.5$   |
| 89           | $48 \pm 5$     | 75           | $9.4 \pm 0.6$  | 81           | $23 \pm 2$      | 80           | $11 \pm 3$      |
| 96           | $47 \pm 4$     | 80           | $37 \pm 6$     | 88           | $23 \pm 2$      | 88           | $36.0 \pm 3$    |
| 103          | $32 \pm 4$     | 90           | $92 \pm 8$     | 102          | $14 \pm 2$      | 98           | $66 \pm 4$      |
| 111          | $29 \pm 2.$    | 97           | $87 \pm 8$     | 110          | $11 \pm 2$      | 111          | $36 \pm 6$      |
| 121          | $14 \pm 5$     | 104          | $89 \pm 7$     | 120          | $1.30 \pm 0.05$ | 119          | $11 \pm 1$      |
|              |                | 112          | $66 \pm 5$     |              |                 | 129          | $0.60 \pm 0.05$ |
|              |                | 122          | $14 \pm 4$     |              |                 |              |                 |
